# Supplementary material for: Clusthaplo: a plug-in for MCQTL to enhance QTL detection using ancestral alleles in multi-cross design
Source: PubMed Central journal article supplement (PMC3964294; doi:10.1007/s00122-014-2267-1), 2014-01-31
Supplement: 122_2014_2267_MOESM1_ESM.pdf [file 122_2014_2267_MOESM1_ESM.pdf]

## **Clusthaplo: a plug-in for MCQTL to enhance QTL detection using ancestral alleles in multi-cross design - Supplementary tables and figure**

**Damien Leroux · Abdelaziz Rahmani ·  
Sylvain Jasson · Marjolaine Ventelon ·  
Florence Louis · Laurence Moreau ·  
Brigitte Mangin**

Received: date / Accepted: date

---

Damien Leroux  
INRA, UR875, Unité de Mathématique et Informatique Appliquées de Toulouse, Chemin  
de Borde Rouge, F-31326 Castanet-Tolosan, France  
Tel.: +33561285493  
Fax: +33561285335  
E-mail: Damien Leroux - Damien.Leroux@toulouse.inra.fr

Abdelaziz Rahmani  
INRA, UR875, Unité de Mathématique et Informatique Appliquées de Toulouse, Chemin  
de Borde Rouge, F-31326 Castanet-Tolosan, France  
E-mail: Abdelaziz Rahmani - rahmani.abdelaziz@gmail.com

Sylvain Jasson  
INRA, UR875, Unité de Mathématique et Informatique Appliquées de Toulouse, Chemin  
de Borde Rouge, F-31326 Castanet-Tolosan, France  
E-mail: Sylvain Jasson - sylvain.jasson@toulouse.inra.fr

Marjolaine Ventelon  
EURALIS SEMENCES, Service Biométrie, Domaine de Sandreau, 31700 MONDONVILLE,  
France  
E-mail: Marjolaine Ventelon - marjolaine.ventelon@euralis.fr

Florence Louis  
Syngenta Seeds, 12 chemin de l'Hobit, 31790 Saint-Sauveur, France  
E-mail: Florence Louis - florence.louis@syngenta.com

Laurence Moreau  
INRA, UMR 0320 / UMR 8120 Genet Vegetale, Ferme du Moulon F-91190 Gif Sur Yvette,  
France  
E-mail: Laurence Moreau - moreau@moulon.inra.fr

Brigitte Mangin  
INRA, UR875, Unité de Mathématique et Informatique Appliquées de Toulouse, Chemin  
de Borde Rouge, F-31326 Castanet-Tolosan, France  
E-mail: Brigitte Mangin - Brigitte.Mangin@toulouse.inra.fr

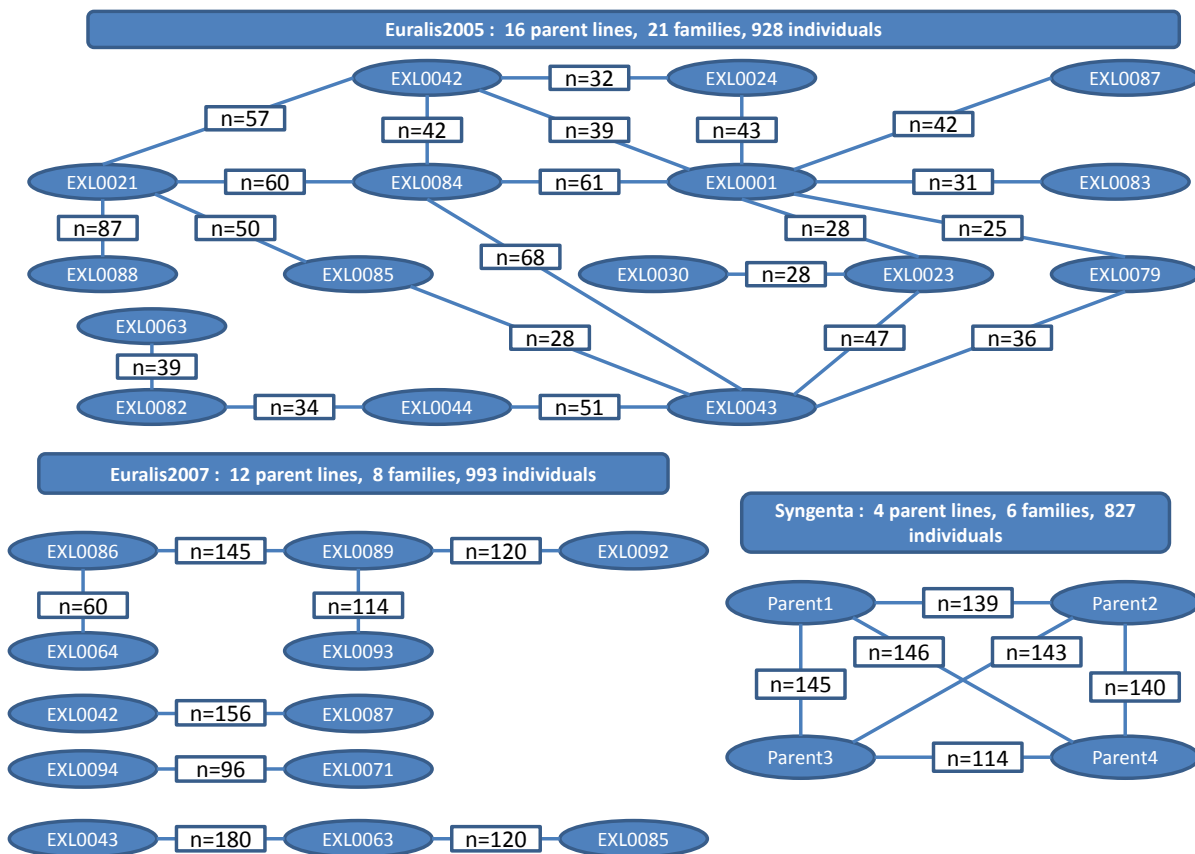

**Fig. S1** Maize designs used by the simulations. The parent lines are represented by blue ovals. Those that were crossed are linked by a blue line, on which the white box gives the number of genotyped and phenotyped descendants.

Table S1: Pearson correlation of the power and the gain of MCQTL\_LD over MCQTL, for the precision within a surrounding interval of 1 cM, 2 cM, 5 cM and 10 cM.

| Design      | value of the mutated allele | Method   | average power | 1 cM  | 2cM   | 5cM      | 10 cM    |
|-------------|-----------------------------|----------|---------------|-------|-------|----------|----------|
| Syngenta    | 0.15                        | MCQTL    | 41.23         | -0.05 | -0.13 | -0.02    | -0.03    |
|             |                             | MCQTL_LD | 43.50         | 0.14  | 0.11  | 0.26**   | 0.33***  |
|             | 0.25                        | MCQTL    | 88.13         | -0.02 | -0.21 | -0.06    | 0.11     |
|             |                             | MCQTL_LD | 89.30         | 0.11  | -0.02 | 0.16     | 0.30 **  |
| Euralis2007 | 0.15                        | MCQTL    | 22.48         | -0.10 | -0.09 | -0.08    | -0.06    |
|             |                             | MCQTL_LD | 26.17         | -0.06 | 0.001 | 0.25 *   | 0.25 *   |
|             | 0.25                        | MCQTL    | 59.14         | -0.21 | -0.18 | -0.09    | -0.32 ** |
|             |                             | MCQTL_LD | 68.08         | -0.13 | -0.13 | 0.01     | -0.13    |
| Euralis2005 | 0.25                        | MCQTL    | 43.51         | 0.01  | 0.08  | 0.37***  | 0.53 *** |
|             |                             | MCQTL_LD | 57.42         | 0.03  | 0.15  | 0.38 *** | 0.59 *** |
|             | 0.35                        | MCQTL    | 75.35         | -0.06 | -0.04 | 0.10     | 0.18     |
|             |                             | MCQTL_LD | 85.66         | -0.04 | 0.02  | 0.09     | 0.17     |

\* for  $0.05 < p\text{-value} \leq 0.01$ , \*\* for  $0.01 < p\text{-value} \leq 0.001$  and \*\*\* for  $0.001 < p\text{-value}$ .

Table S2: Pearson correlation of “being on a marker” and the gain of MCQTL\_LD over MCQTL, for the precision within a surrounding interval of 1 cM, 2 cM, 5 cM, 10 cM and the power.

| Design      | value of the mutated allele | 1 cM  | 2cM   | 5cM      | 10 cM | power |
|-------------|-----------------------------|-------|-------|----------|-------|-------|
| Syngenta    | 0.15                        | -0.10 | -0.19 | -0.24 *  | -0.06 | 0.08  |
|             | 0.25                        | -0.12 | -0.12 | -0.30 ** | -0.06 | -0.13 |
| Euralis2007 | 0.15                        | -0.03 | 0.007 | 0.04     | 0.04  | 0.08  |
|             | 0.25                        | -0.13 | -0.05 | -0.006   | 0.14  | 0.20  |
| Euralis2005 | 0.25                        | -0.03 | 0.09  | 0.08     | 0.14  | 0.08  |
|             | 0.35                        | -0.06 | 0.07  | -0.007   | 0.11  | -0.02 |

\* for  $0.05 < p\text{-value} \leq 0.01$ , \*\* for  $0.01 < p\text{-value} \leq 0.001$  and \*\*\* for  $0.001 < p\text{-value}$ .

Table S3: Pearson correlation of the variability of locus information and the gain of MC-QTL.LD over MCQTL, for the precision within a surrounding interval of 1 cM, 2 cM, 5 cM, 10 cM and the power.

| Design      | value of the mutated allele | 1 cM   | 2cM   | 5cM     | 10 cM    | power    |
|-------------|-----------------------------|--------|-------|---------|----------|----------|
| Syngenta    | 0.15                        | 0.02   | -0.04 | 0.02    | 0.10     | 0.21*    |
|             | 0.25                        | -0.02  | -0.14 | -0.01   | 0.13     | -0.06    |
| Euralis2007 | 0.15                        | -0.14  | -0.10 | 0.006   | -0.12    | 0.16     |
|             | 0.25                        | -0.12  | -0.08 | -0.03   | -0.34*** | -0.09    |
| Euralis2005 | 0.25                        | -0.012 | 0.06  | 0.38*** | 0.46***  | 0.10     |
|             | 0.35                        | -0.09  | -0.10 | 0.06    | 0.16     | -0.80*** |

\* for  $0.05 < \text{p-value} \leq 0.01$ , \*\* for  $0.01 < \text{p-value} \leq 0.001$  and \*\*\* for  $0.001 < \text{p-value}$ .

The variability of locus information was calculated following

$$\sum_d 1_{\{QTL^l(P1) \neq QTL^l(P2); d=P1P2\}} \sum_n (X_{dn}^l - X_d^l)^2$$

where  $l$  denotes a locus,  $d$  denotes a descendant family,  $P_1 P_2$  denote the two parent lines of  $d$ ,  $n$  denotes the individuals,  $X_{dn}^l = 2 * Z_{dnP1}^l - 1$  with  $Z_{dnP1}^l$  is the probability of the  $n$ th individual of descendant family  $d$  having the homozygous genotype  $P1P1$  at locus  $l$  given its marker information and  $X_d^l$  is the  $X_{dn}^l$  mean of  $d$ ,  $1_x$  equals 1 if  $x$  is true and 0 otherwise and  $QTL^l(P1)$  (resp.  $QTL^l(P2)$ ) denotes the QTL allele of parent line  $P1$  (resp.  $P2$ ) at locus  $l$ .
